# Supplementary material for: A fluorescent probe for intracellular cysteine overcoming the interference by glutathione
Source: Royal Society of Chemistry journal article supplement (doi:10.1039/c4ob00382a), 2014-07-03
Supplement: c4ob00382a1.pdf [file c4ob00382a1.pdf]

## Supporting information

### A Fluorescent Probe for Intracellular Cysteine Overcoming the Interference by Glutathione

Minggang Tian,<sup>a</sup> Fuqiang Guo,<sup>a,e</sup> Yuming Sun,<sup>b</sup> Weijia Zhang,<sup>a</sup> Fang Miao,<sup>a</sup> Yong Liu,<sup>a</sup> Guofen Song,<sup>a</sup> Cheuk-Lam Ho,<sup>d</sup> Xiaoqiang Yu,<sup>\*a</sup>, Jing Zhi Sun<sup>\*c</sup> and Wai-Yeung Wong<sup>\*d,f</sup>

<sup>a</sup> Centre of Bio and Micro/Nano Functional Materials, State Key Lab of Crystal Materials, Shandong University, Jinan 250100, P. R. China.

E-mail: yuxq@sdu.edu.cn. Tel: +86(531)88366418

<sup>b</sup> School of Information Science and Engineering, Shandong University.

<sup>c</sup> MoE Key Laboratory of Macromolecule Synthesis and Functionalization, Department of Polymer Science and Engineering, Zhejiang University, Hangzhou 310027, P. R. China. E-mail:

sunjz@zju.edu.cn

<sup>d</sup> Institute of Molecular Functional Materials and Department of Chemistry and Partner State Key Laboratory of Environmental and Biological Analysis, Hong Kong Baptist University, Hong Kong, P. R. China. E-mail: rwywong@hkbu.edu.hk

<sup>e</sup> Department of Physics, Changji University, Changji, Xinjiang, 831100, P. R. China.

<sup>f</sup> Institute of Polymer Optoelectronic Materials and Devices, State Key Laboratory of Luminescent Materials and Devices, South China University of Technology, Guangzhou 510640, P. R. China.

# Table of contents

## Results and discussion

|              |    |
|--------------|----|
| Fig. S1..... | S3 |
| Fig. S2..... | S4 |
| Fig. S3..... | S4 |
| Fig. S4..... | S5 |
| Fig. S5..... | S6 |
| Fig. S6..... | S7 |
| Fig. S7..... | S8 |
| Fig. S8..... | S9 |

## Synthesis of **HOTA**

|                |     |
|----------------|-----|
| Scheme S1..... | S10 |
| Fig. S9.....   | S11 |
| Fig. S10.....  | S12 |
| Fig. S11.....  | S13 |
| Fig. S12.....  | S14 |
| Fig. S13.....  | S15 |
| Fig. S14.....  | S15 |
| Fig. S15.....  | S16 |

## Results and discussion

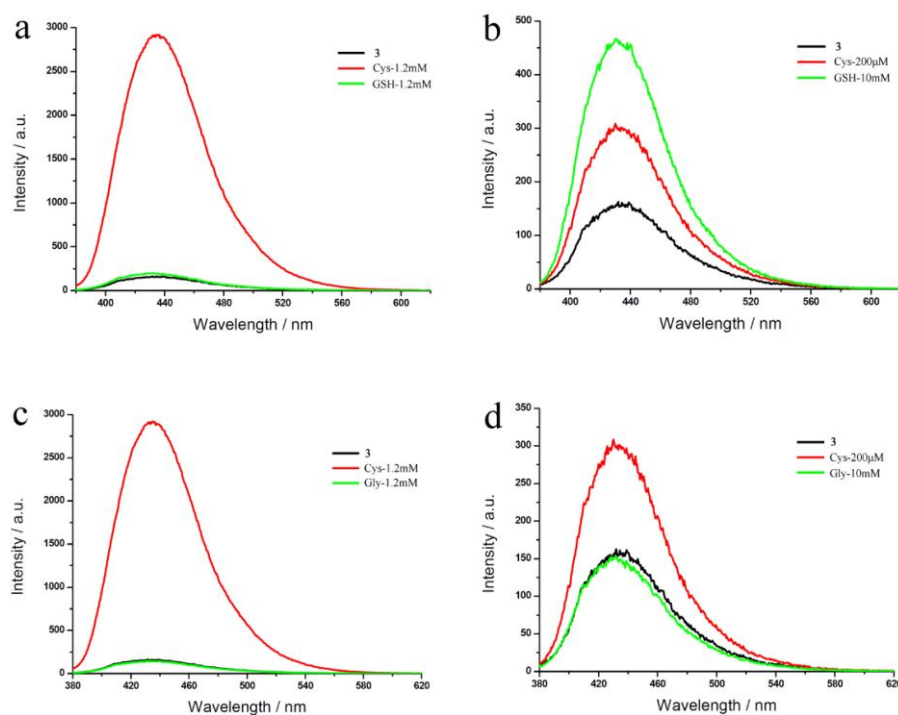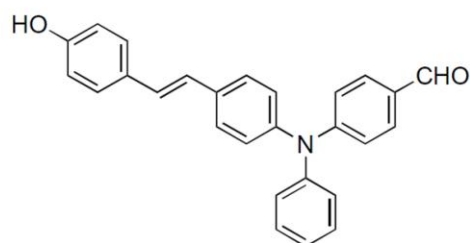

Structure of molecule **3**

Fig. S1 Fluorescent spectra of probe **3** (10  $\mu$ M) and in the presence of various analytes in EtOH/PBS buffer solution (v/v, 4:1),  $\lambda_{\text{ex}} = 365$  nm. (a) 1.2 mM Cys and 1.2 mM GSH; (b) 200  $\mu$ M Cys and 10 mM GSH; (c) 1.2mM Cys and 1.2mM Gly; (d) 200  $\mu$ M Cys and 10 mM Gly.

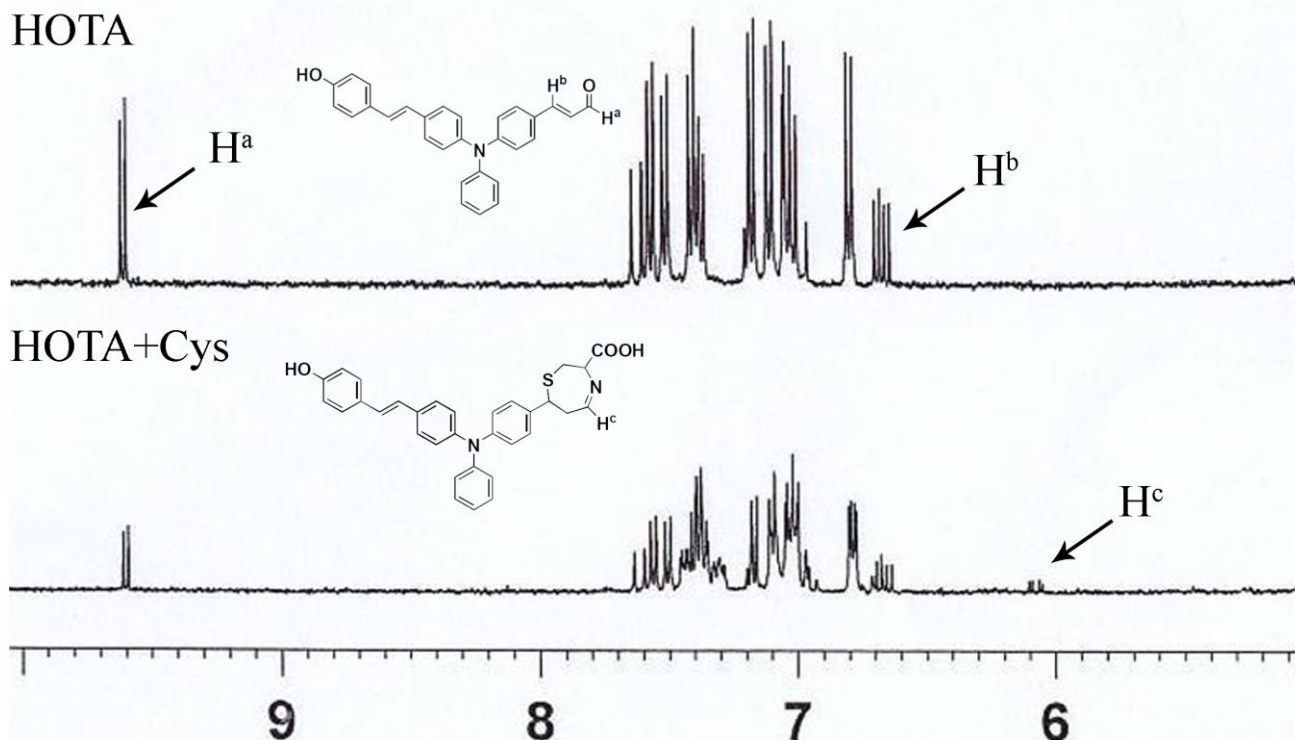

Fig. S2  $^1\text{H}$  NMR spectra of **HOTA** itself and in the presence of Cys in  $\text{CD}_3\text{OD}$ .

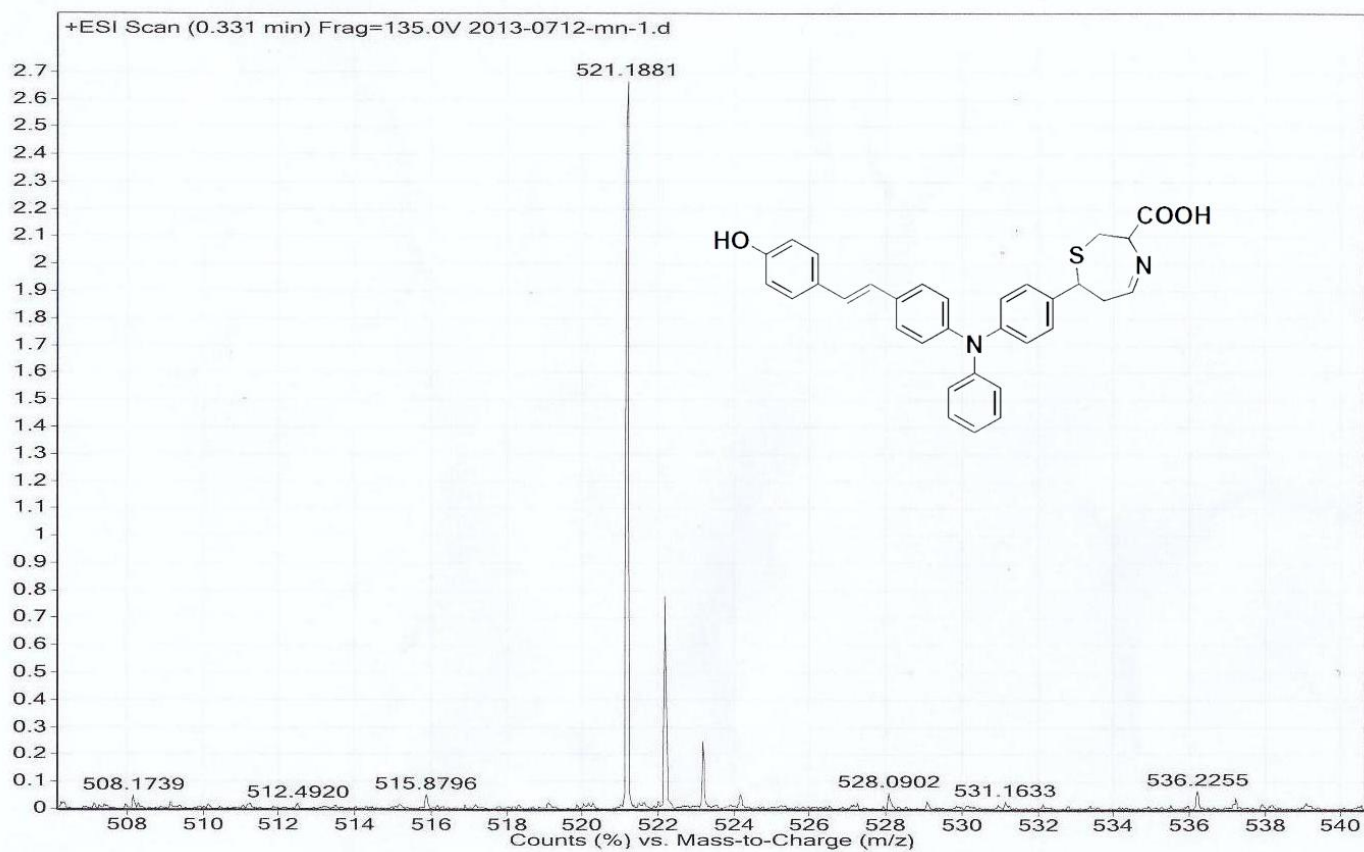

Fig. S3 HRMS spectra of mixture of **HOTA** and Cys in the mixed solvents of EtOH and  $\text{H}_2\text{O}$  (v/v, 1:1).

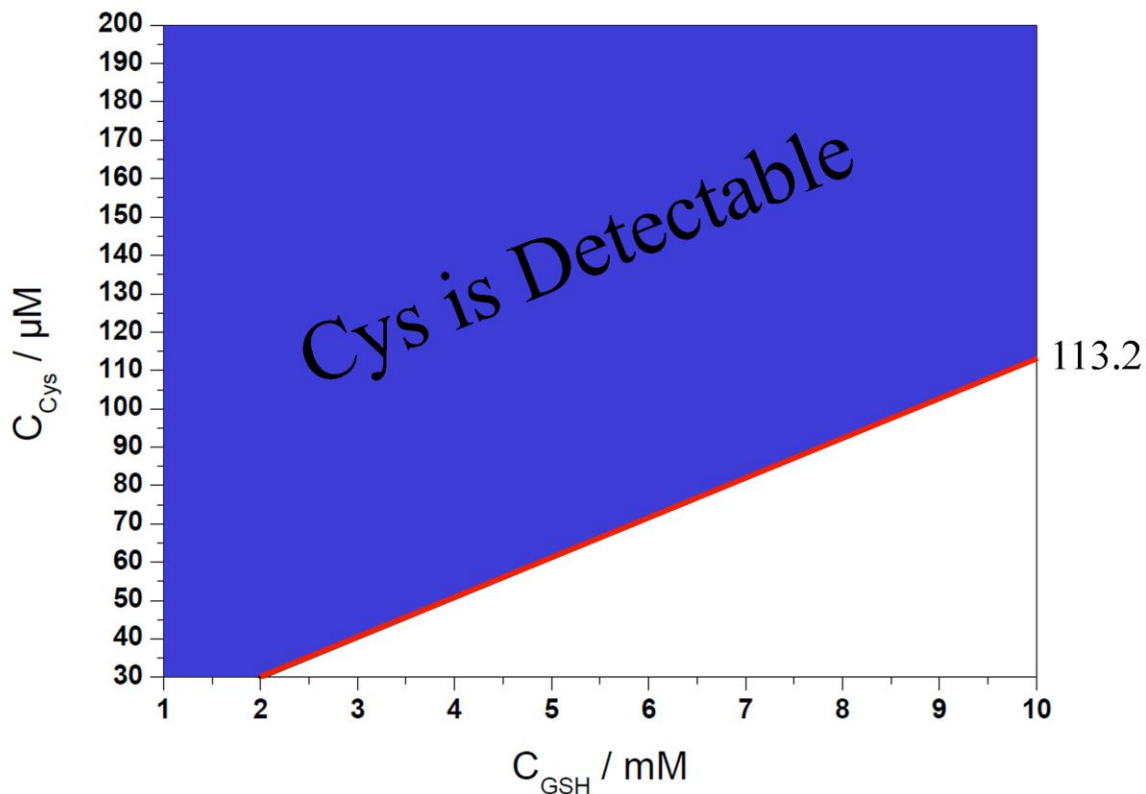

Fig. S4 Intracellular concentration ranges of GSH (1~10 mM) and Cys (30~200  $\mu\text{M}$ ). The fluorescence intensity of **HOTA**+Cys is 3 times stronger than that of GSH when their concentrations are in the area marked with blue colour ( $C_{\text{HOTA}} = 10 \mu\text{M}$ ).

Note: According to our titration experiments, the relationship between fluorescence intensity at 450 nm and concentration of Cys/GSH could be depicted by two equations:

$$I_{\text{Cys}} \geq 86.57 + 7.937 * C_{\text{Cys}} (\mu\text{M}); I_{\text{GSH}} = 53.18 + 27.5 * C_{\text{GSH}} (\text{mM}).$$

where  $I_{\text{Cys}}$  and  $I_{\text{GSH}}$  are the fluorescence intensities of HOTA in the presence of Cys and GSH, respectively, and  $30 \leq C_{\text{Cys}} \leq 200$ ,  $1 \leq C_{\text{GSH}} \leq 10$ . Therefore, the interference from GSH could be ignored when  $I_{\text{Cys}} > 3I_{\text{GSH}}$  or  $86.57 + 7.937 * C_{\text{Cys}} (\mu\text{M}) > 3 * [53.18 + 27.5 * C_{\text{GSH}} (\text{mM})]$ . Finally, a new equation can be deduced:  $7.937 * C_{\text{Cys}} (\mu\text{M}) - 82.5 * C_{\text{GSH}} (\text{mM}) - 72.97 > 0$ , and  $30 \leq C_{\text{Cys}} \leq 200$ ,  $1 \leq C_{\text{GSH}} \leq 10$ . This new equation can be transferred to a two-dimension picture that presented above.

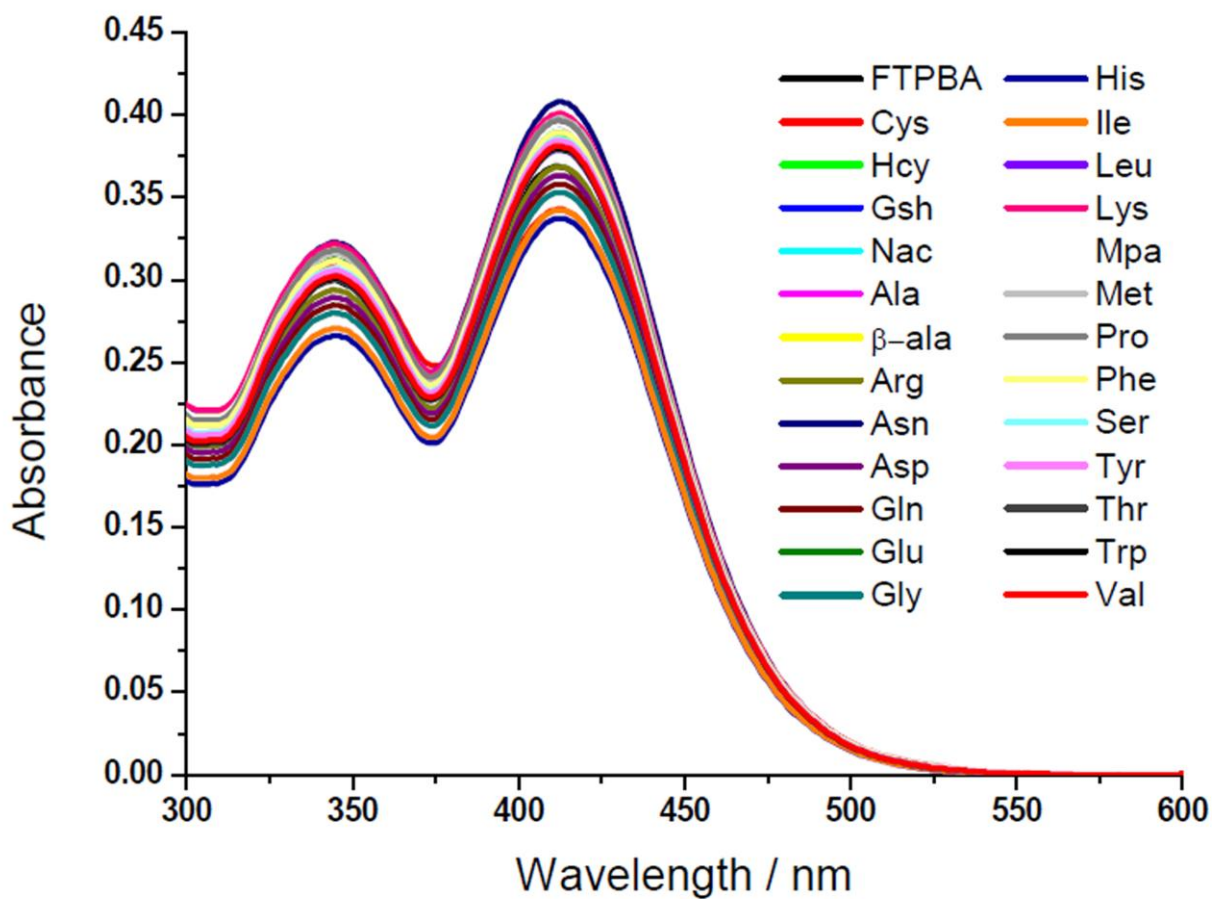

Fig. S5 Absorbance spectra of **HOTA** (10 μM) itself and in the presence of 200 μM of various analytes EtOH/PBS buffer solution (v/v, 1:1, pH 7.4).

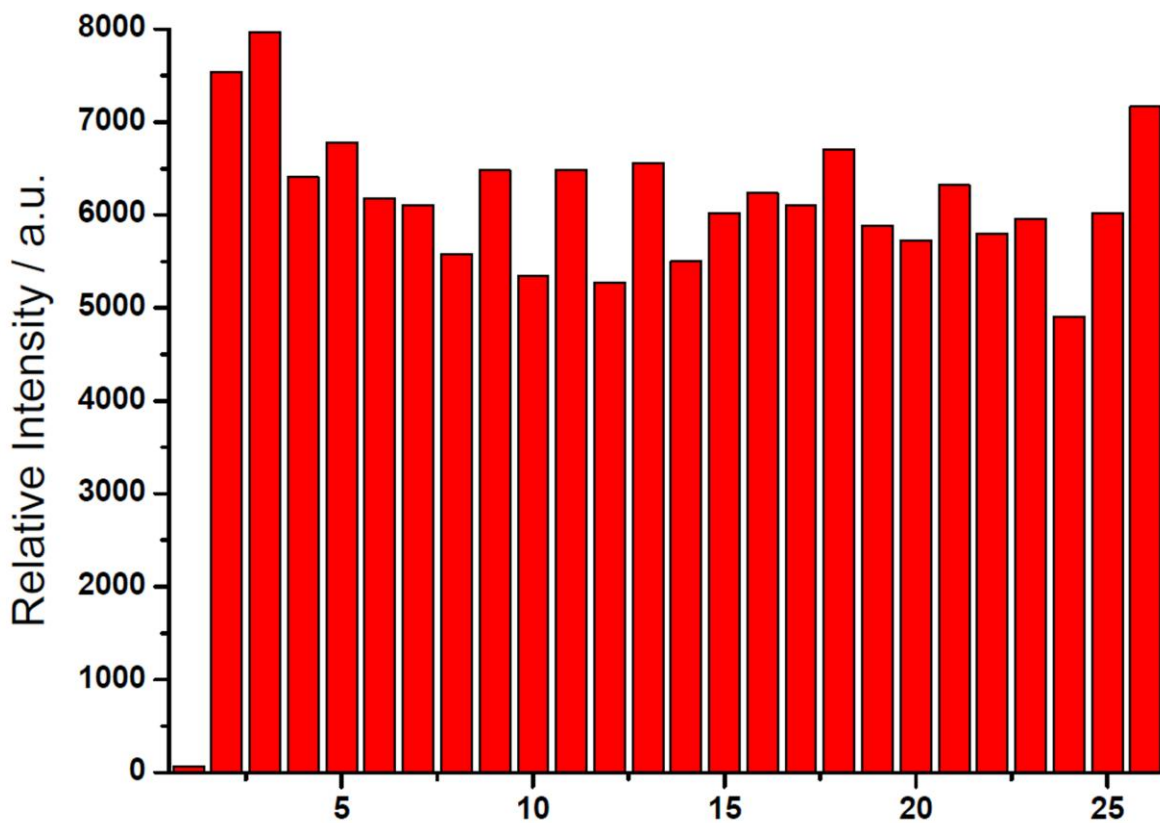

Fig. S6 Fluorescent intensities at 450 nm of **HOTA** (10  $\mu$ M) in the presence of Cys (200  $\mu$ M) and other bio-analytes (200  $\mu$ M) in EtOH/PBS buffer solution (v/v, 1:1, pH 7.4): 1: **HOTA**, 2: **HOTA**+Cys, 3: 2+Hcy, 4: 2+GSH, 5: 2+NAC, 6: 2+Ala, 7: 2+ $\beta$ -ala, 8: 2+Arg, 9: 2+Asn, 10: 2+Asp, 11: 2+Gln, 12: 2+Glu, 13: 2+Gly, 14: 2+His, 15: 2+Ile, 16: 2+Lys, 17: 2+Leu, 18: 2+Mpa, 19: 2+Met, 20: 2+Pro, 21: 2+Phe, 22: 2+Ser, 23: 2+Tyr, 24: 2+Thr, 25: 2+Trp, 26: 2+Val. ( $\lambda_{\text{ex}} = 365$  nm).

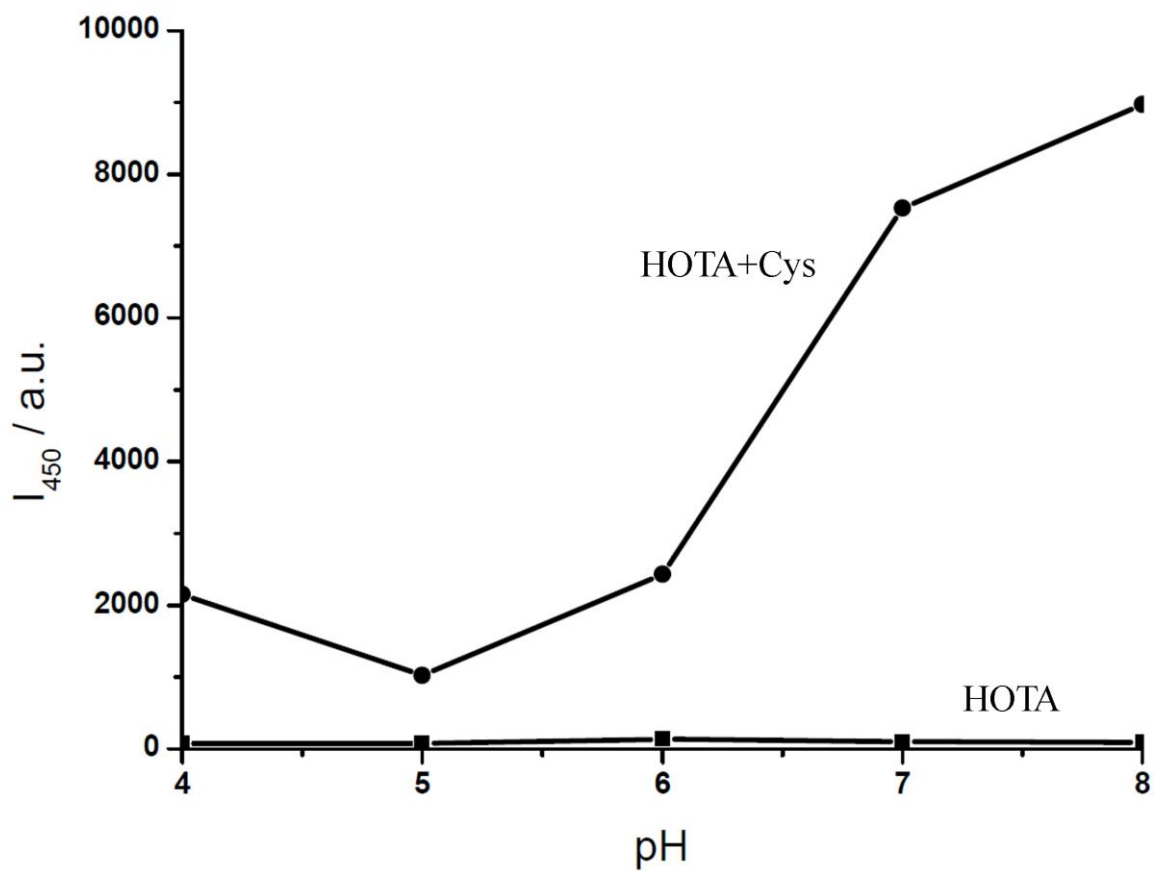

Fig. S7 Fluorescence intensity at 450 nm of **HOTA** (10  $\mu$ M) and **HOTA** (10  $\mu$ M) + Cys (200  $\mu$ M) in EtOH/PBS buffer solution (v/v, 1:1) at different pH values. ( $\lambda_{ex}$  = 365 nm).



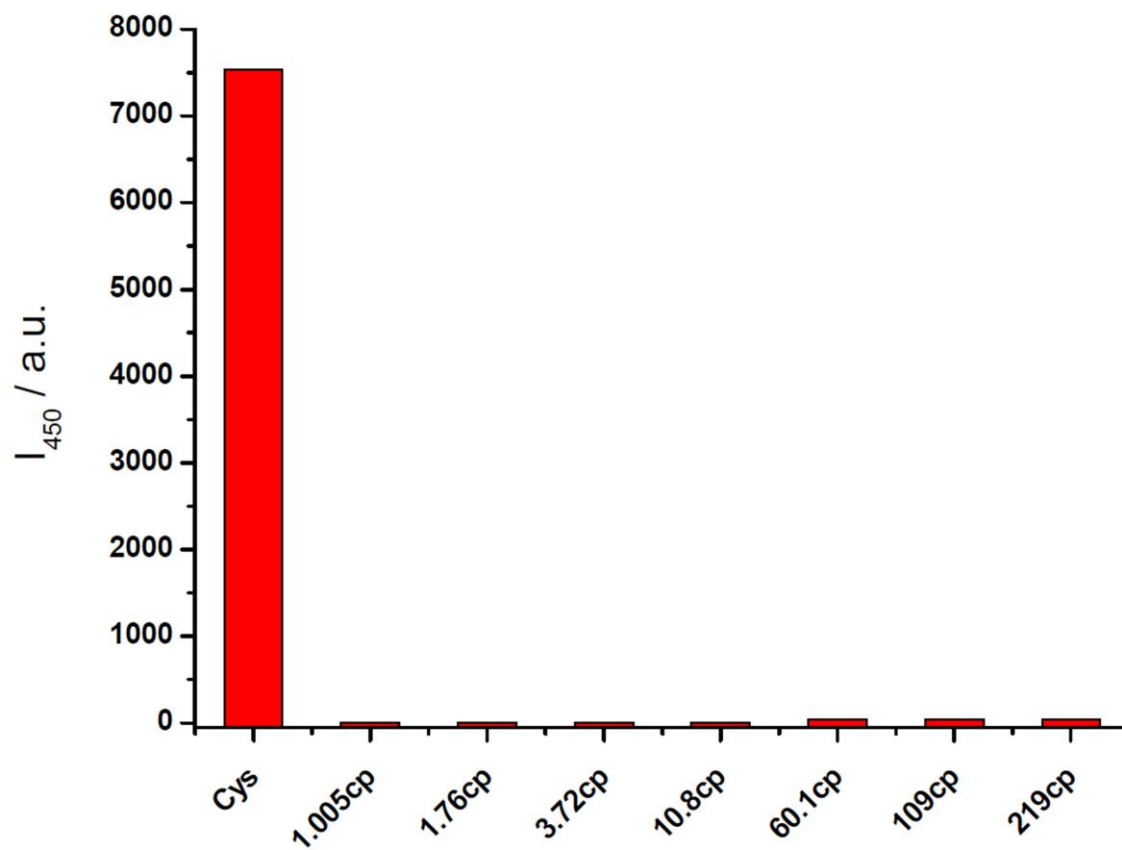

Fig. S8 Fluorescence intensity at 450 nm of **HOTA** (10  $\mu\text{M}$ ) + Cys (200  $\mu\text{M}$ ) in EtOH/PBS buffer solution (v/v, 1:1, pH 7.4) and **HOTA** (10  $\mu\text{M}$ ) in the solution of glycerol and H<sub>2</sub>O with different viscosities.

## Synthesis of HOTA

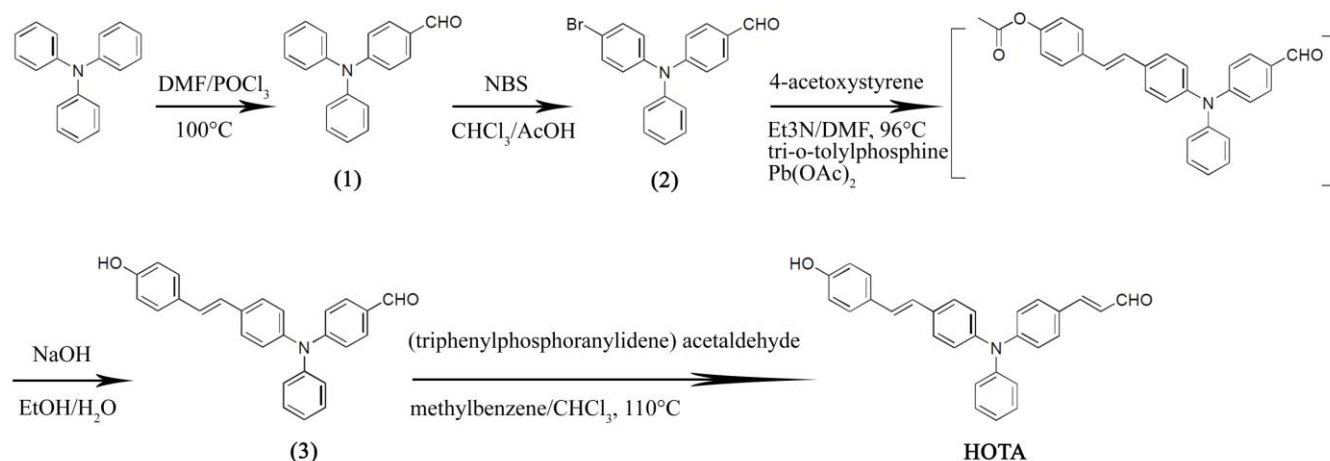

Scheme S1. The synthetic route of **HOTA**.

### Synthesis of 4-formyltriphenylamine (1):

Phosphoryl chloride (2.02 mL, 24.5 mmol) was dropwisely added to a mixture of triphenylamine (5.0 g, 20.4 mmol) and dry dimethylformamide (35 mL) at 0 °C with stirring. The reaction mixture was stirred at room temperature for 1 h and then mixture was warmed at 100 °C under the protection of nitrogen for 8 h. After being cooled to room temperature, the reaction mixture was poured into ice-water, neutralized with NaOH solution and then extracted with CH<sub>2</sub>Cl<sub>2</sub>. The combined organic phase was washed with water and saturated brine, dried over anhydrous MgSO<sub>4</sub> overnight. After CH<sub>2</sub>Cl<sub>2</sub> was removed, the crude product was purified by column chromatography with ethyl acetate/petroleum ether (10:1) as eluent, finally the light-yellow solid was obtained for **1** with a yield of 83%. <sup>1</sup>H NMR (400 MHz, DMSO-*d*<sub>6</sub>): δ (ppm) 9.77 (s, 1H), 7.72 (d, *J* = 8.7, 2H), 7.42 (t, *J* = 7.8, 2H), 7.24~7.20 (m, 6H), 6.88 (d, *J* = 8.7, 2H).

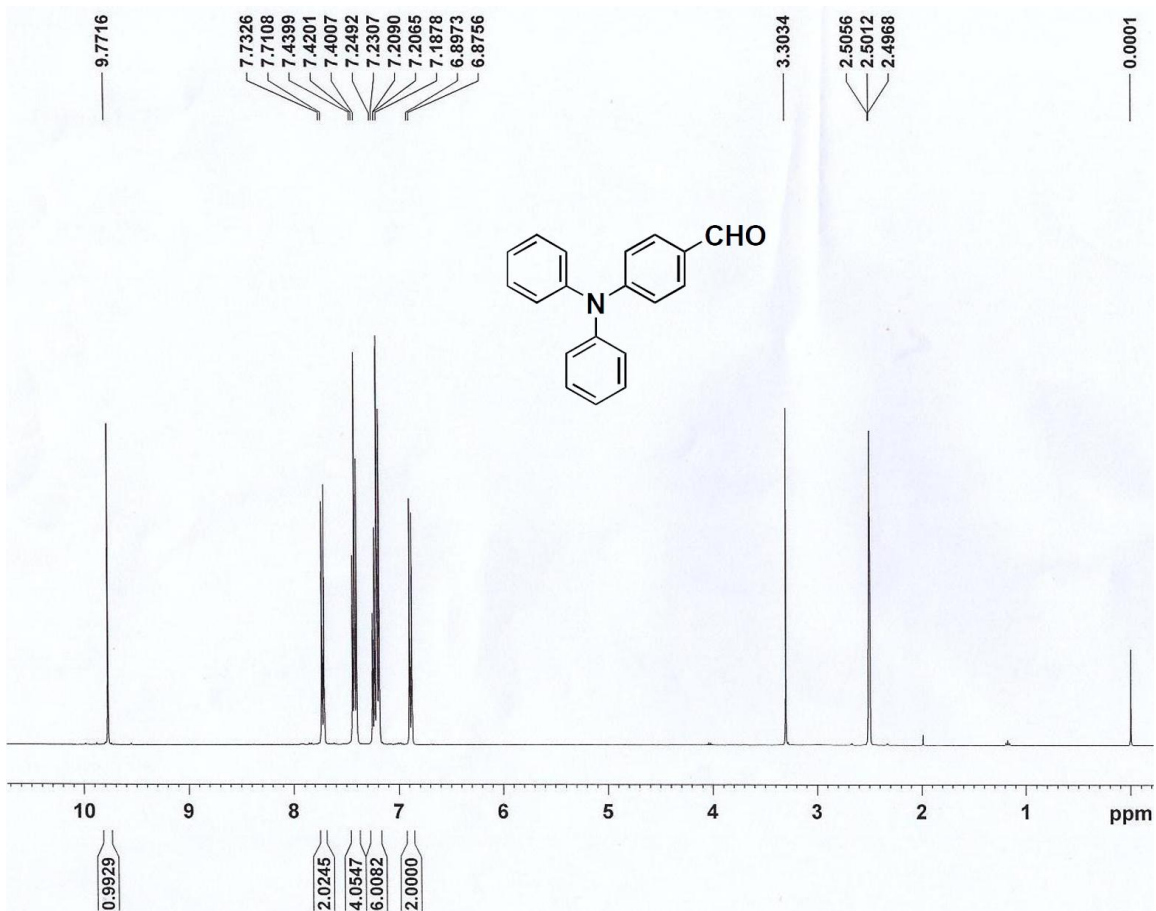

Fig. S9 <sup>1</sup>H NMR spectrum of compound **1** in DMSO-*d*<sub>6</sub>.

### Synthesis of (4-bromophenyl)-(4-formylphenyl)-(phenyl)amine (**2**):

NBS (0.39 g, 2.20 mmol) was added to a solution of compound **1** (0.50 g, 1.83 mmol) in chloroform/AcOH (30 ml, v/v, 1:1) at room temperature. The mixture was stirred under the protection of nitrogen for 20 h at room temperature and then quenched with water, and the aqueous layer was extracted with CH<sub>2</sub>Cl<sub>2</sub>. The organic phase was washed with water and saturated brine, dried over anhydrous magnesium sulfate overnight. After CH<sub>2</sub>Cl<sub>2</sub> was removed, the crude product was purified by column chromatography with ethyl acetate/petroleum ether (10:1) as eluent, finally the light green solid was obtained for **2** with a yield of 86%. <sup>1</sup>H NMR (400 MHz, DMSO-*d*<sub>6</sub>): δ (ppm) 9.80 (s, 1H), 7.75 (d, *J* = 8.60, 2H), 7.57 (d, *J* = 8.68, 2H), 7.43 (d, *J* = 7.76, 2H), 7.25 (d, *J* = 7.32, 1H), 7.19 (d, *J* = 7.88, 2H), 7.12 (d, *J* = 8.64, 2H), 6.94 (d, *J* = 8.60).

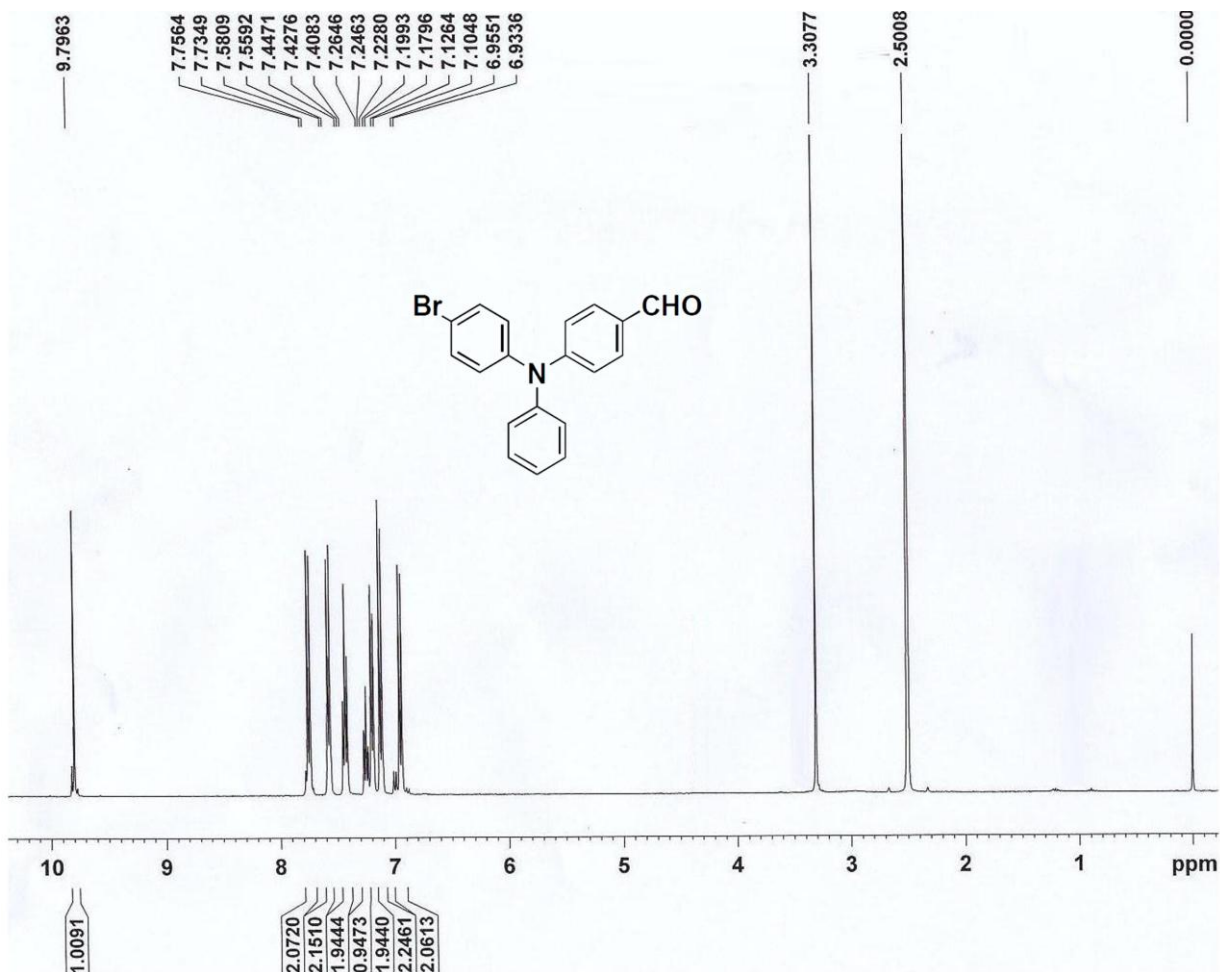

Fig. S10  $^1\text{H}$  NMR spectrum of compound 2 in  $\text{DMSO-}d_6$ .

### Synthesis of (*E*)-(4-(4-hydroxystyrene)phenyl)-(4-formylphenyl)-(4-phenyl)amine (3):

Compound 2 (0.70 g, 1 mmol), palladium(II) acetate (22.5 mg, 0.1 mmol) and tri-*o*-tolylphosphine (92.8 mg, 0.3 mmol) were introduced into a dry and dehydration TEA/DMF (21 mL, 2:1, v/v) mixture, which was stirred under the protection of nitrogen for 30 min. 4-acetoxystyrene (0.46 mL, 3.0 mmol) was added and then the reaction mixture was heated up to 96 °C under nitrogen atmosphere and kept at this temperature in an oil bath for 18 h. The resulting mixture was allowed to cool to room temperature. The crude mixture was diluted with dichloromethane, washed with water and saturated NaCl. After concentration, the remainder was directly transferred to a flask and mixed with EtOH/H<sub>2</sub>O (40 mL, 1:1, v/v). Then solid NaOH (1 g, 0.025 mol) was added to the system and stirred for 8 h. After that, 1 M HCl solution was continuously added until the pH value of the mixture was below 6. The solution was then

extracted with dichloromethane. The extraction liquid was distilled in vacuum and the residue was purified by column chromatography with ethyl acetate/petroleum ether (1:3) as eluent and yellow product (**3**) was obtained with a yield of 57%.  $^1\text{H NMR}$  (400 MHz,  $\text{DMSO-}d_6$ ):  $\delta$  (ppm) 9.78 (s, 1H), 9.60 (br, 1H), 7.74 (d,  $J = 8.60$ , 2H), 7.57 (d,  $J = 8.44$ , 2H), 7.43~7.40 (m, 4H), 7.2 (q,  $J = 7.81$ , 3H), 7.15~6.99 (m, 4H), 6.94 (d,  $J = 8.64$ , 2H), 6.77 (d,  $J = 8.44$ , 2H).

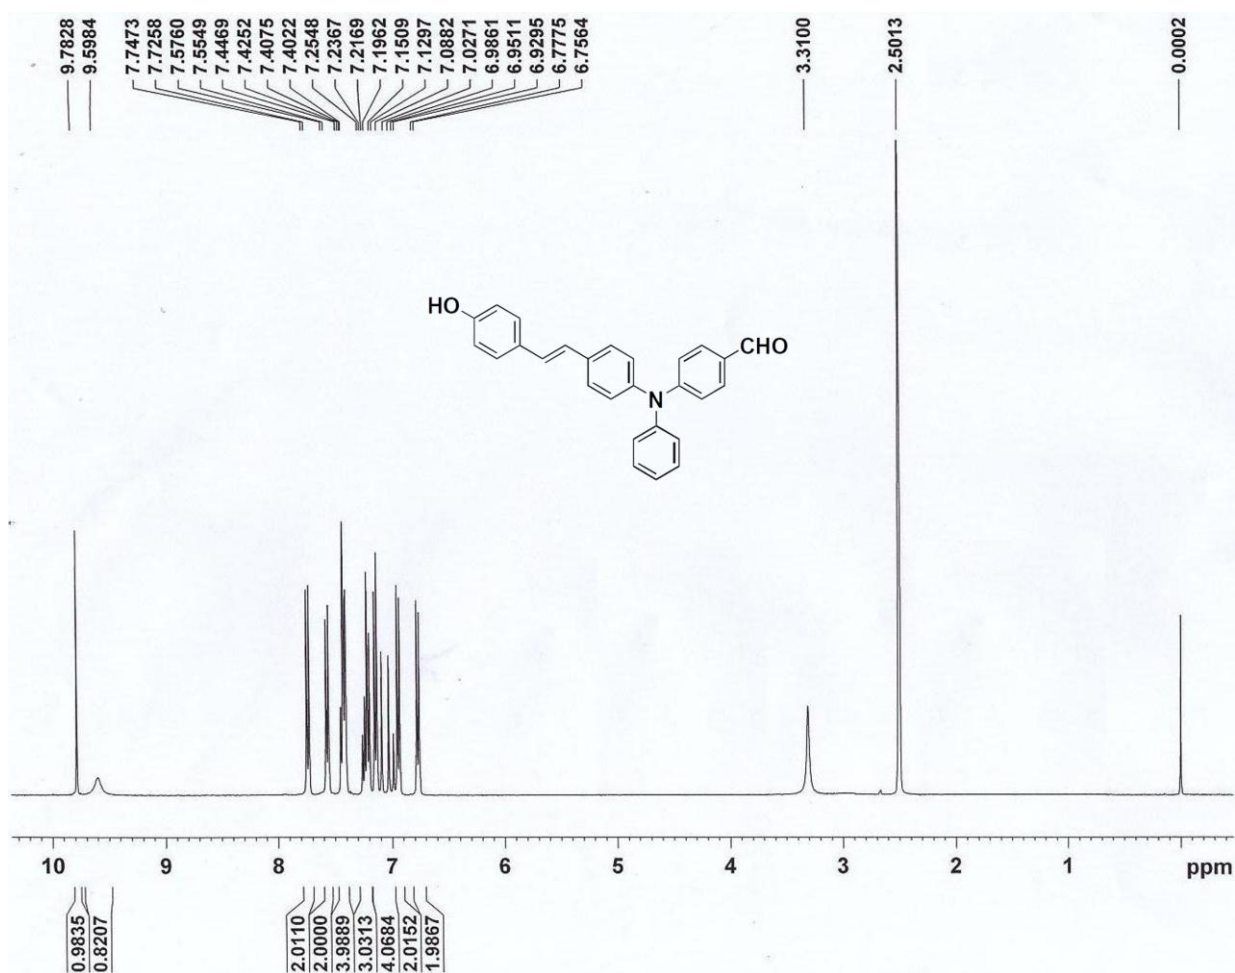

Fig. S11  $^1\text{H NMR}$  spectrum of compound **3** in  $\text{DMSO-}d_6$ .

### Synthesis of (E)-4-(4-cinnamoyl)phenyl-(4-formylphenyl)-(4-phenyl)amine (HOTA):

Compound **3** (0.18 g, 2.0 mmol) was dissolved in 40 mL of 1,4-dimethylbenzene, then added into a flask and bubbled with nitrogen for 30 min. A solution of triphenylphosphoranylidene (182.62 mg, 0.6 mmol) in chloroform (10 ml) was added into the system. The mixture was then bubbled with nitrogen for 30 min and heated at 110  $^{\circ}\text{C}$  for 24 h under the protection of nitrogen and a brownish red suspension was obtained. The mixture was distilled to remove solvent, then poured into  $\text{H}_2\text{O}$  (500 mL) and

extracted with  $\text{CH}_2\text{Cl}_2$  after the resulting mixture was cooled to room temperature. The organic phase was separated, dried with  $\text{MgSO}_4$  and removed by vacuum distillation. Red powder product was obtained after the residue was purified by column chromatography with ethyl acetate/petroleum ether (1:4, v/v) as eluent with a yield of 36.5%.  $^1\text{H}$  NMR (400 MHz, DMSO):  $\delta$  (ppm) 9.60 (d,  $J = 7.88$ , 1H), 9.55 (s, 1H), 7.63 (t,  $J = 7.98$ , 3H), 7.53 (d,  $J = 8.60$ , 2H), 7.40 (m, 4H), 7.20~6.92 (m, 9H), 6.76 (d,  $J = 8.52$ , 2H), 6.69 (dd,  $J_1 = J_2 = 7.88$ , 1H).  $^{13}\text{C}$  NMR (300 MHz, DMSO- $d_6$ ),  $\delta$  (ppm) =194.41, 157.73, 153.30, 150.37, 146.46, 145.30, 134.35, 130.75, 130.33, 128.68, 128.50, 128.24, 127.83, 127.37, 126.54, 126.03, 125.80, 125.16, 124.87, 121.03, 116.04. HRMS (m/z): calcd for  $\text{C}_{27}\text{H}_{23}\text{NO}_2$ : 417.17; found: m/z 418.18 (M + H) $^+$ . IR ( $\text{cm}^{-1}$ ): 1651 ( $\nu_{\text{C}=\text{O}}$ ).

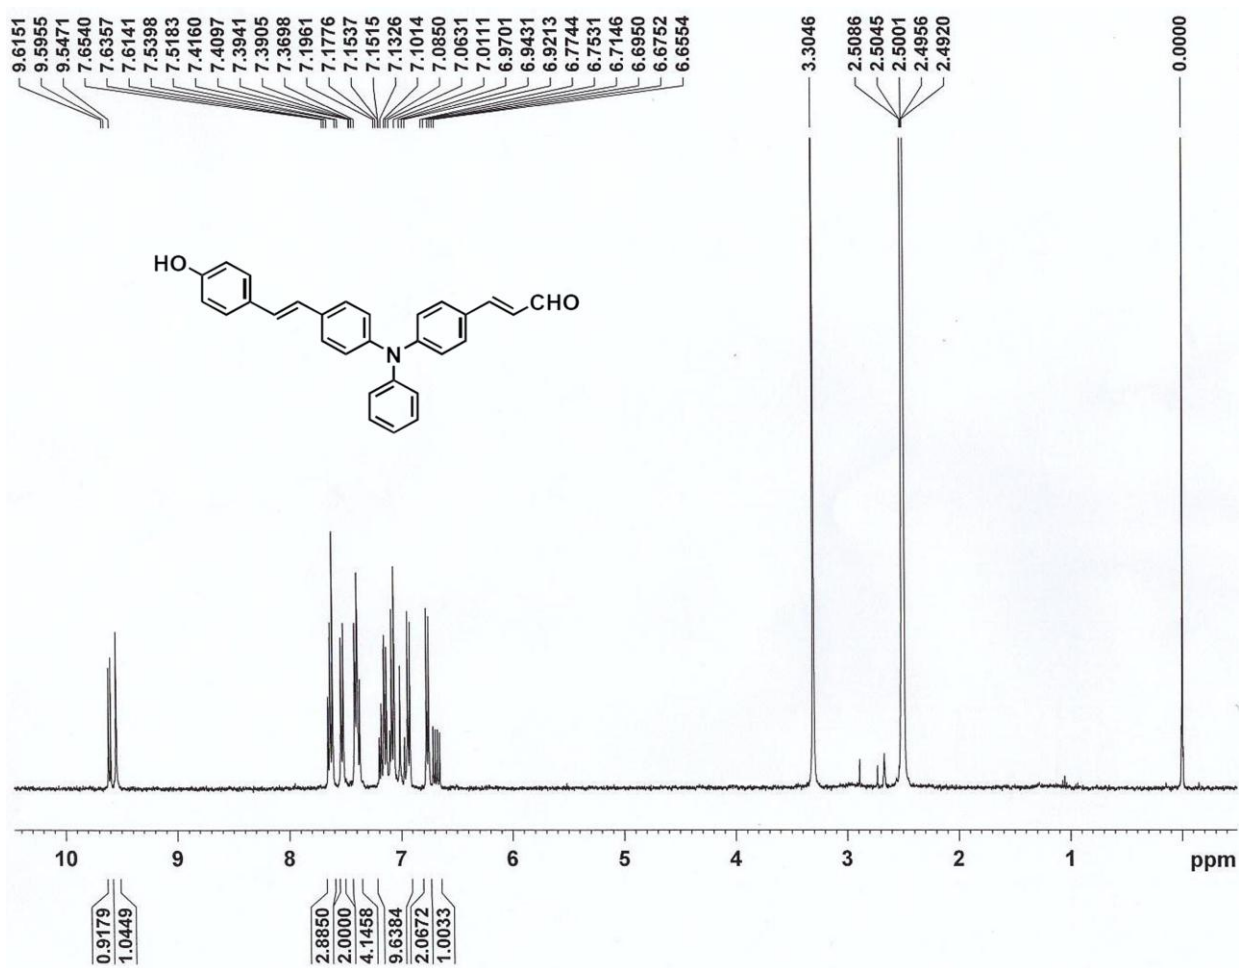

Fig. S12  $^1\text{H}$  NMR spectrum of **HOTA** in DMSO- $d_6$ .

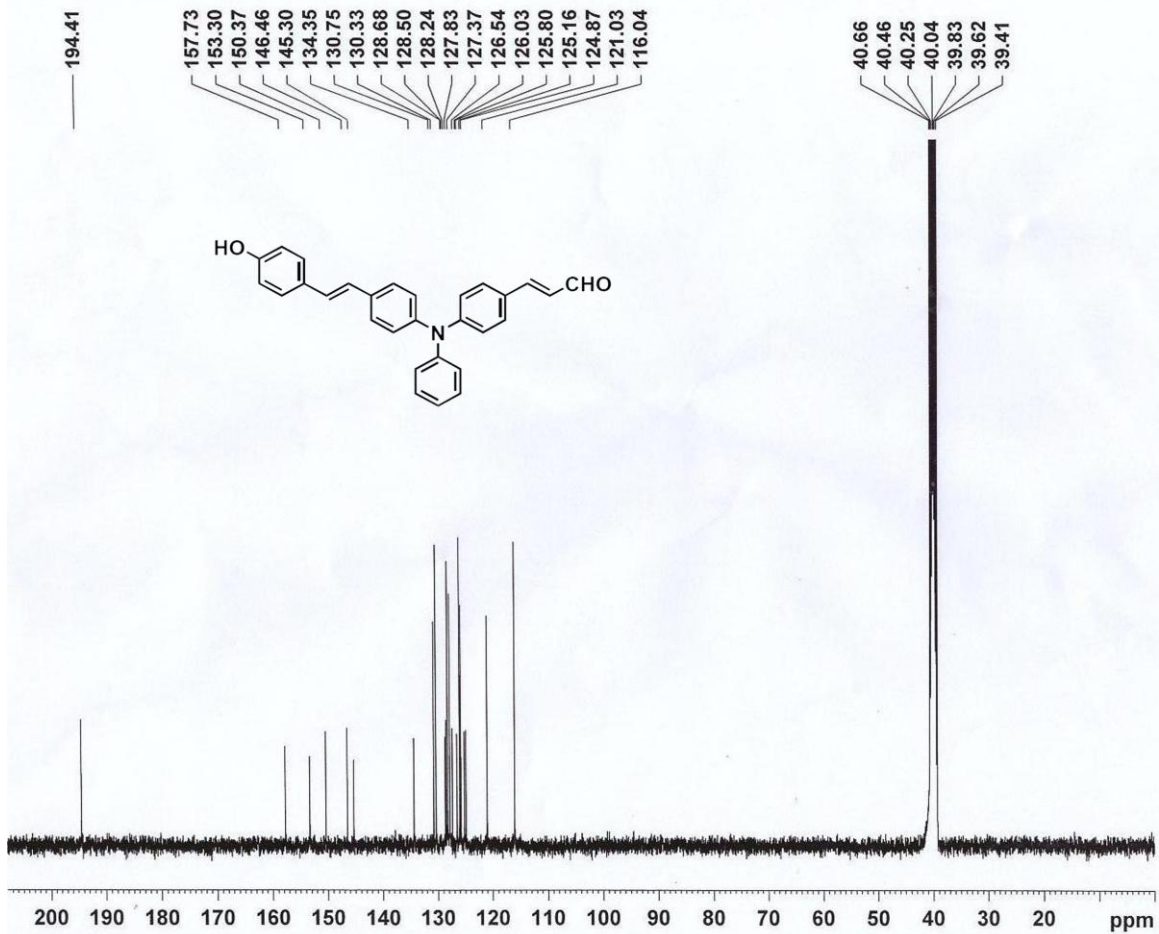

Fig. S13 <sup>13</sup>C NMR spectrum of **HOTA** in DMSO-*d*<sub>6</sub>.

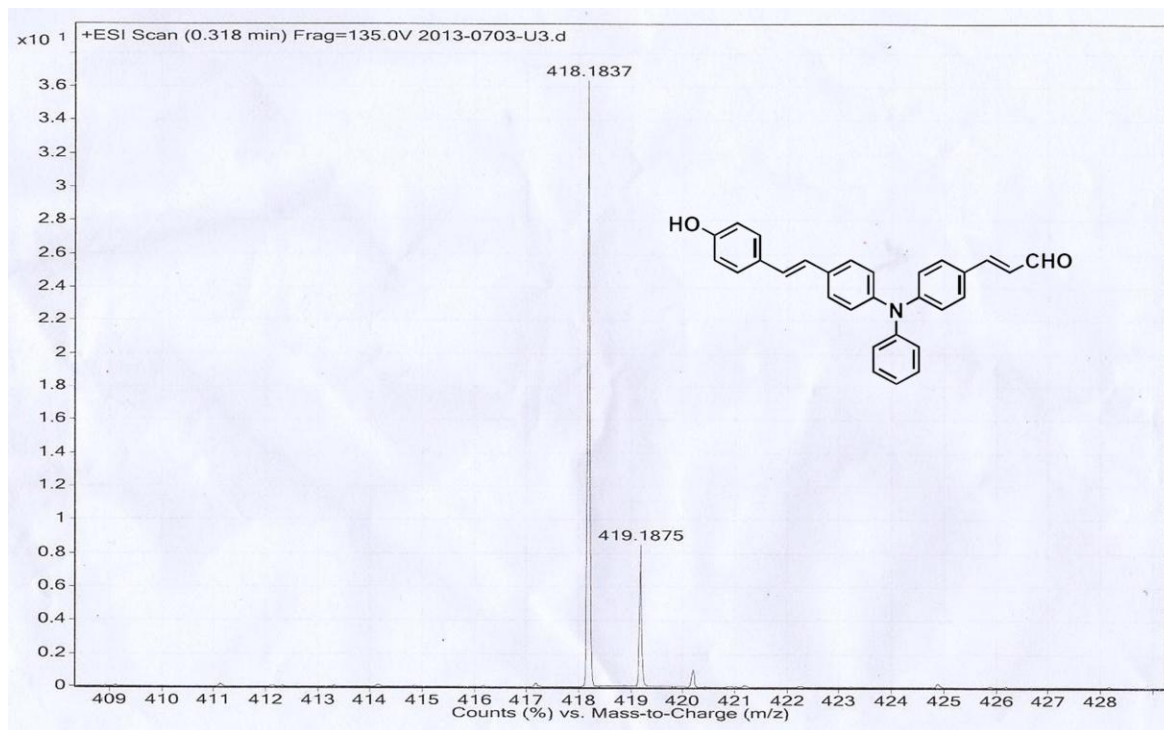

Fig. S14 HRMS of **HOTA** in EtOH.

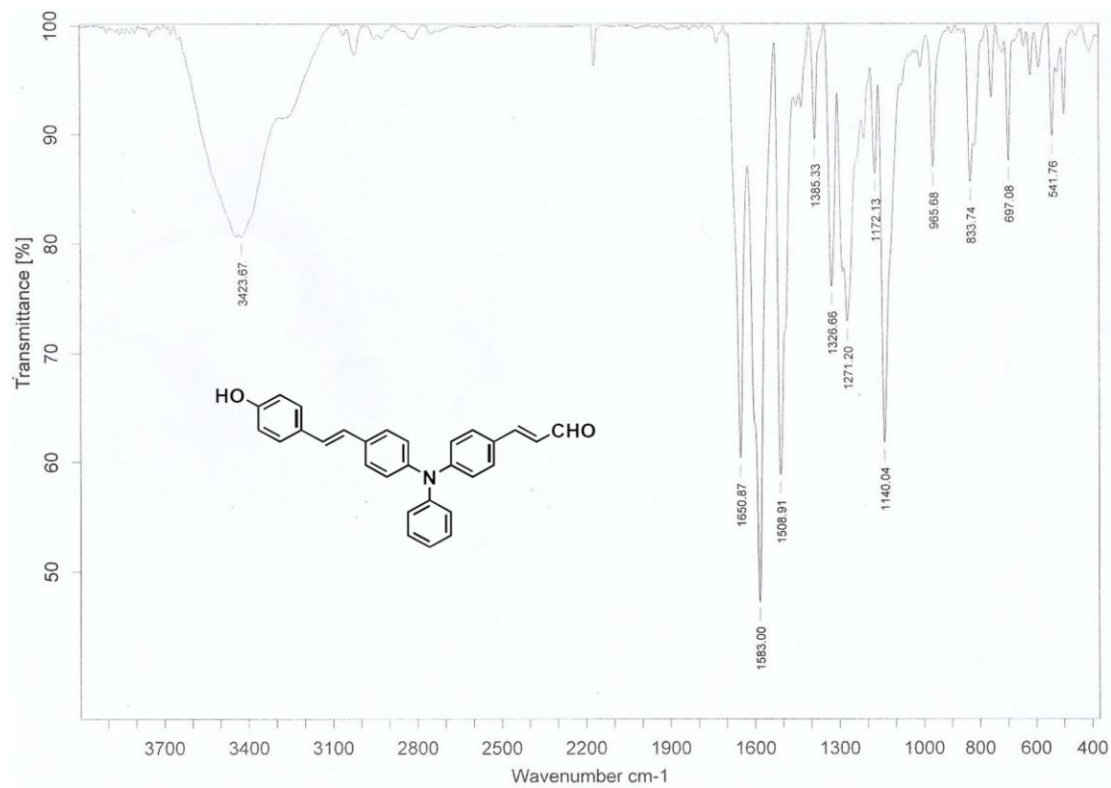

Fig. S15 IR spectrum of **HOTA**.
